# Supplementary material
Source: PubMed Central journal article supplement (PMC3230279)

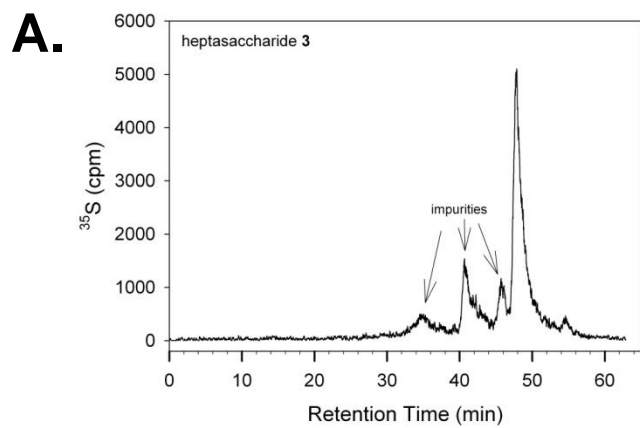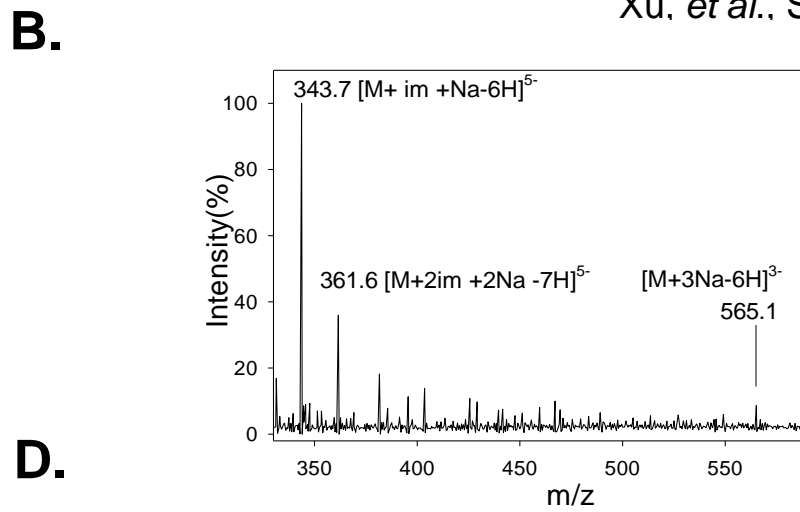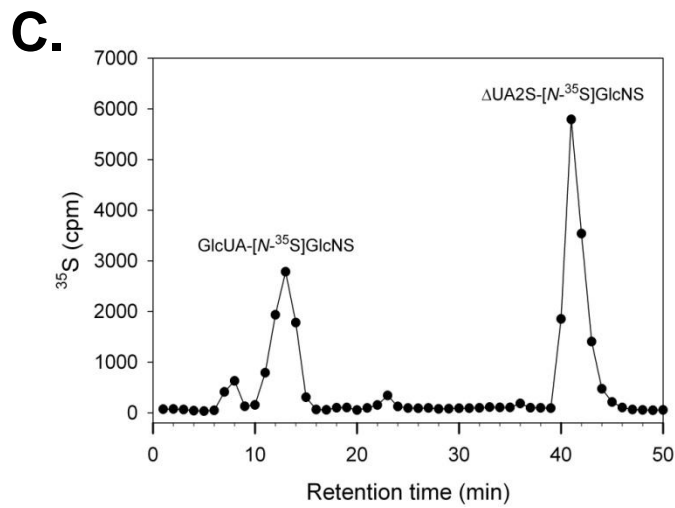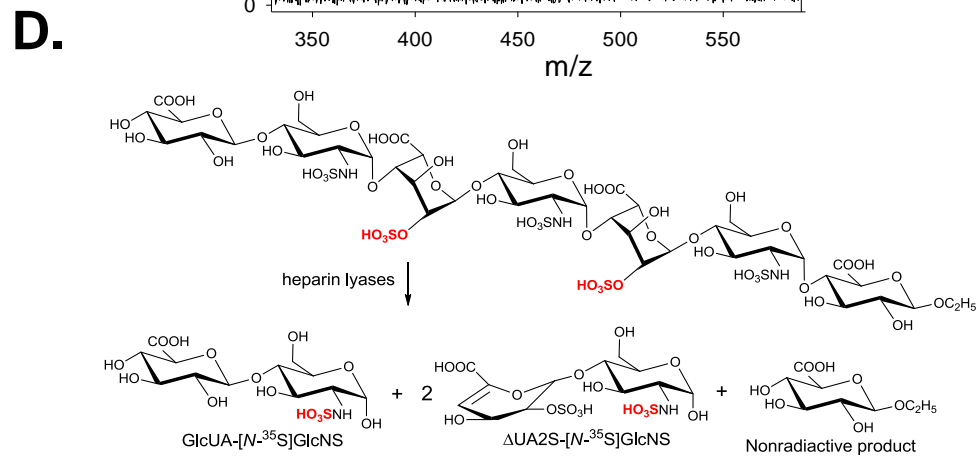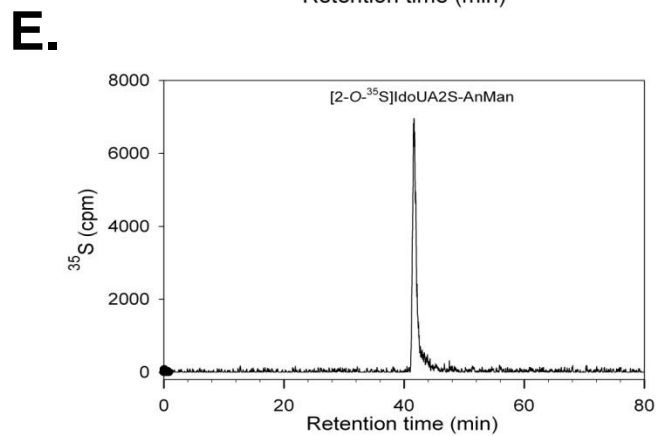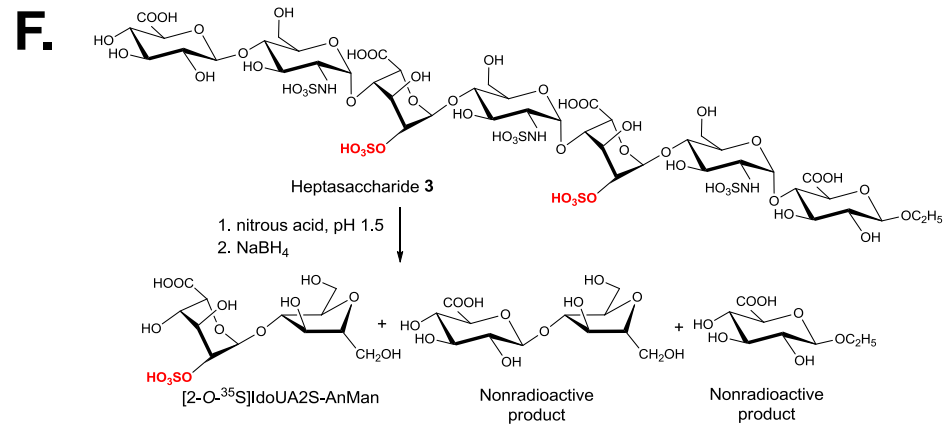

**A.**

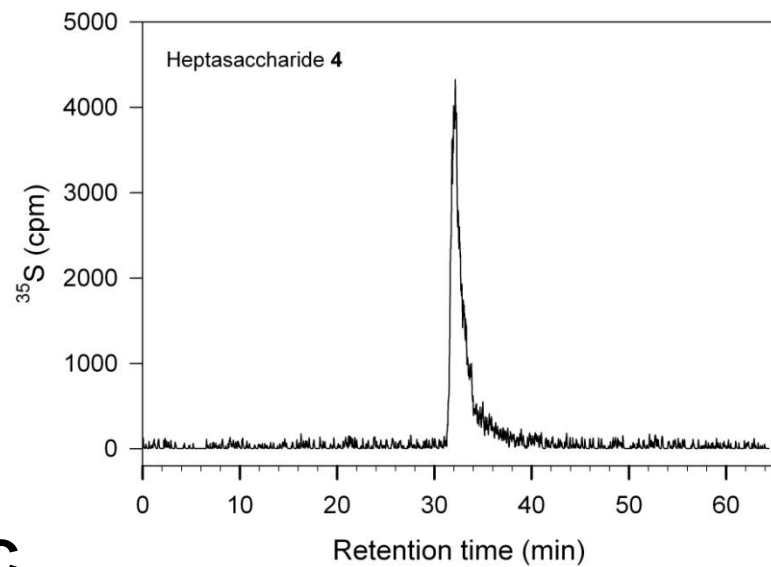

**B.**

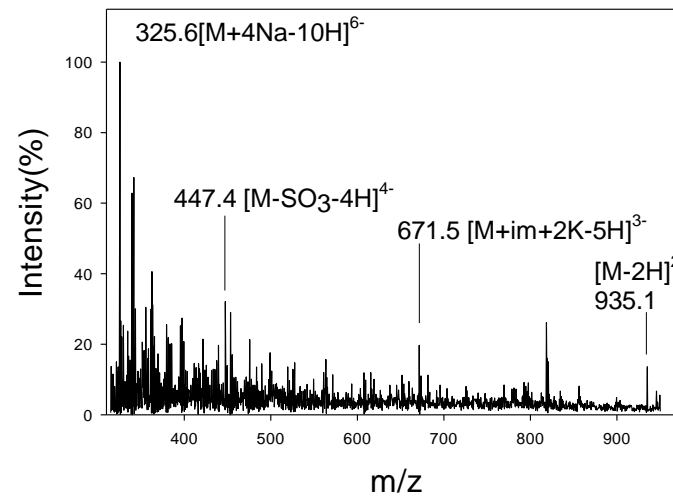

**C.**

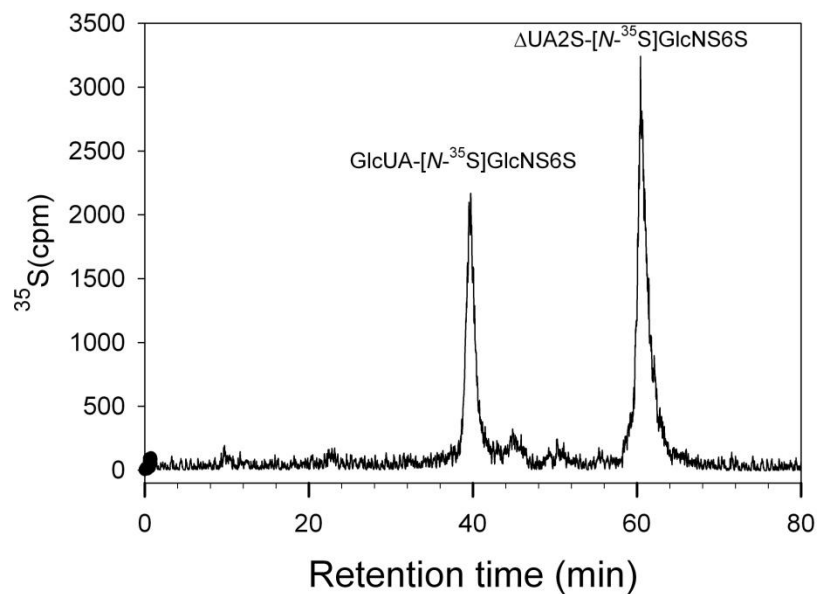

**D.**

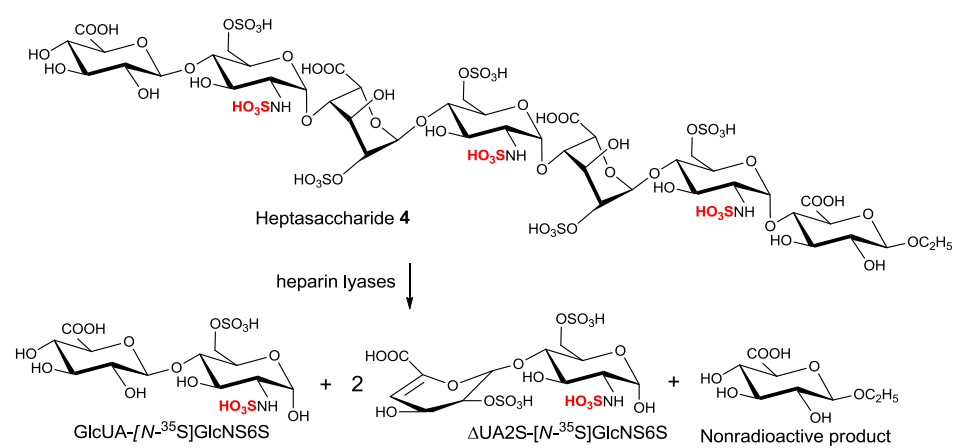

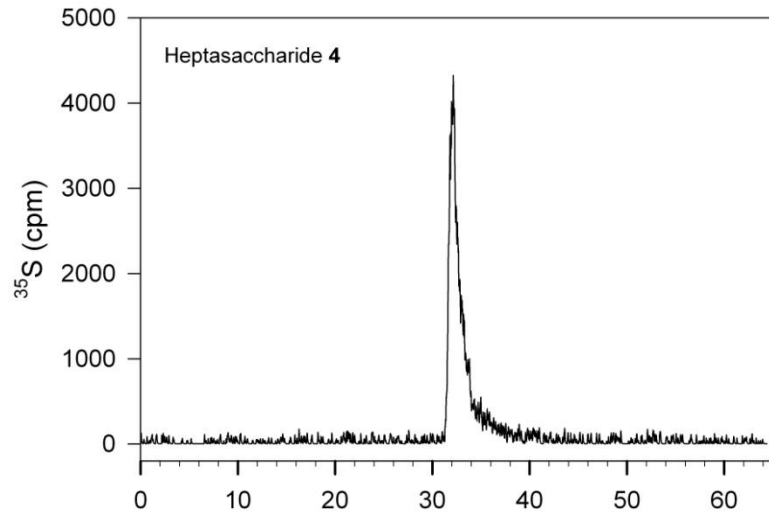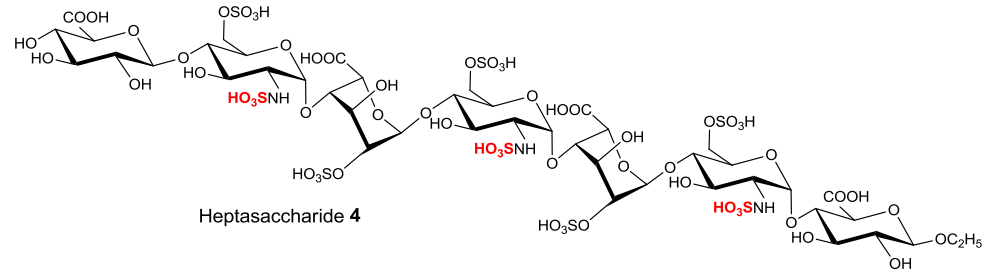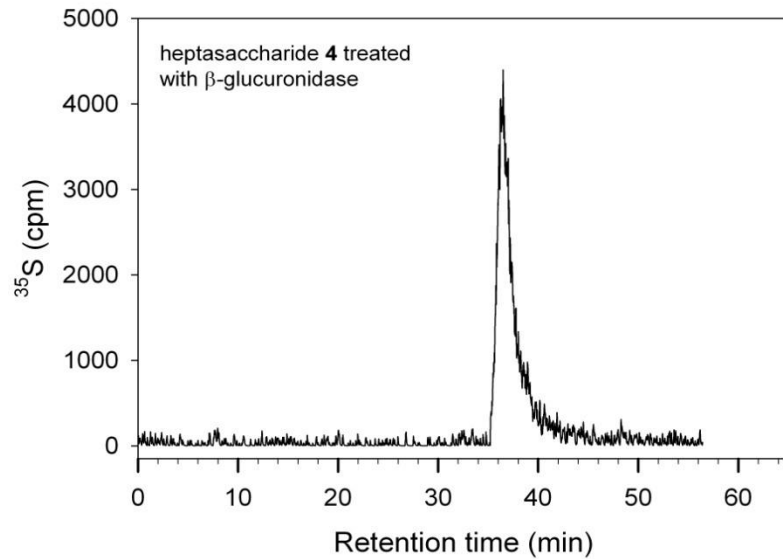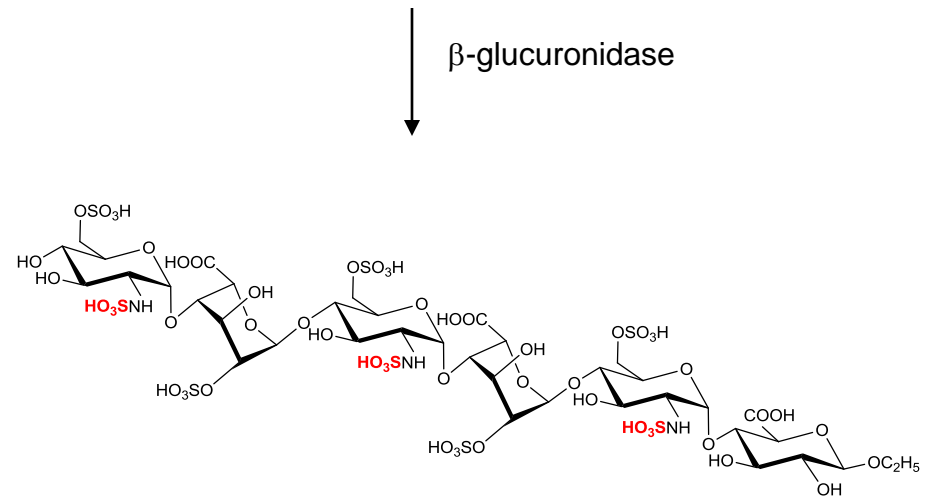

A.

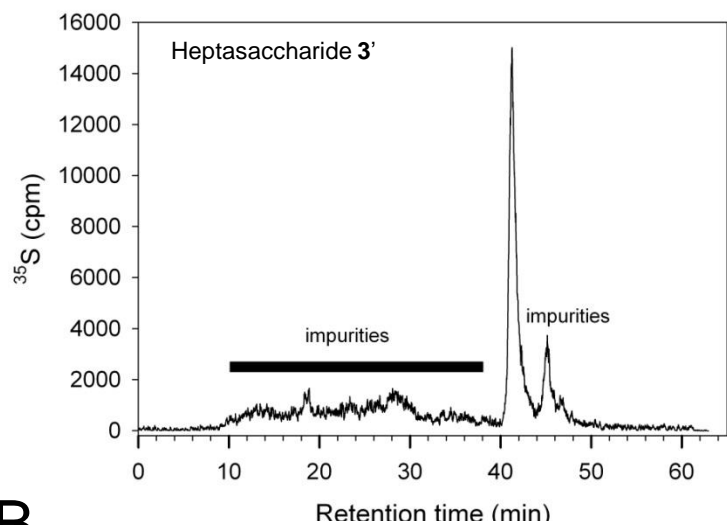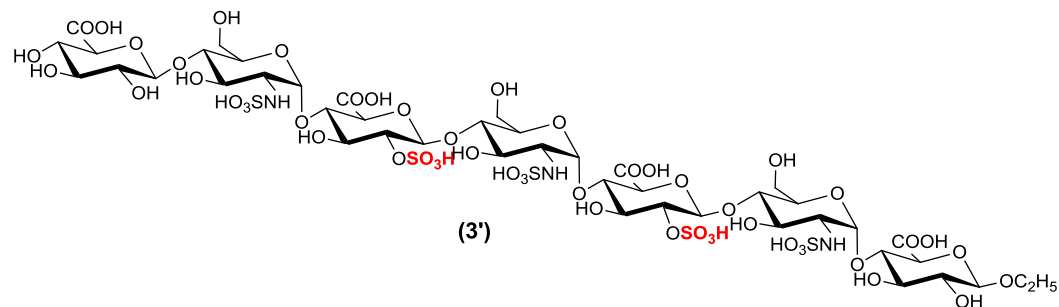

B.

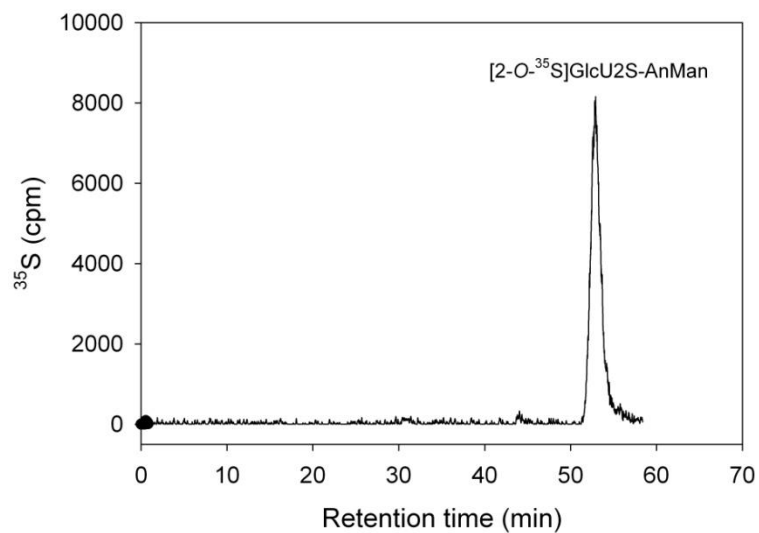

1. Nitrous acid, pH 1.5
2. NaBH<sub>4</sub>

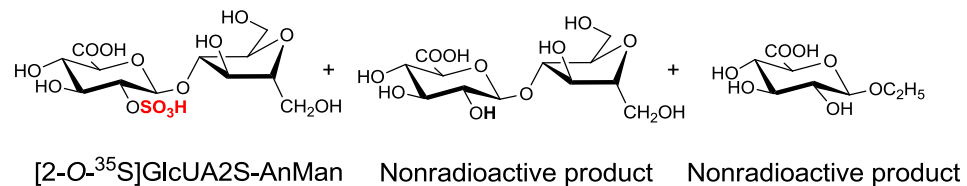

A.

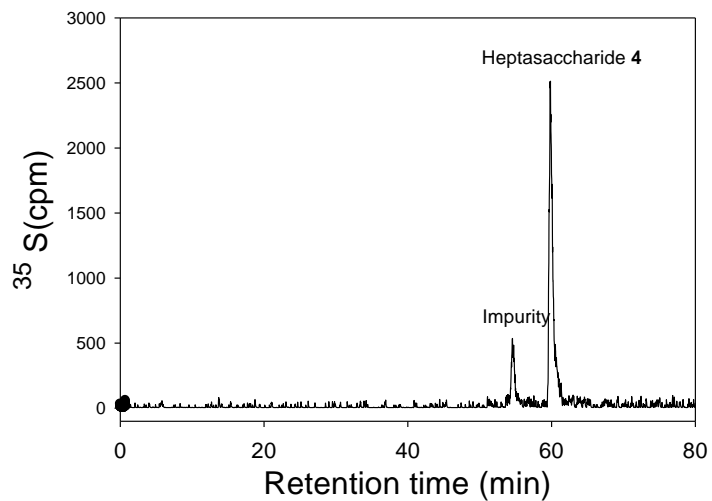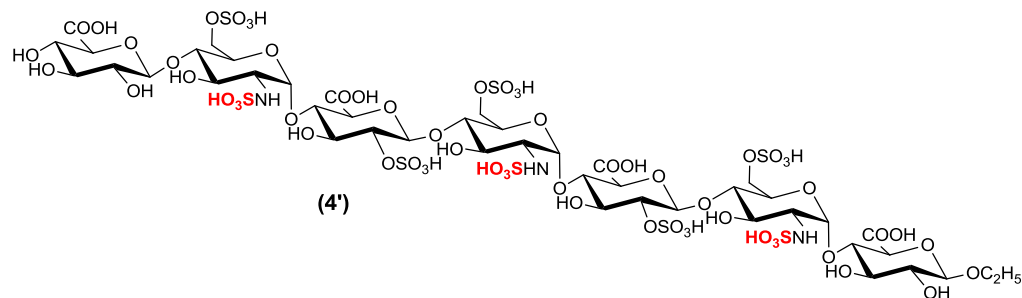

B.

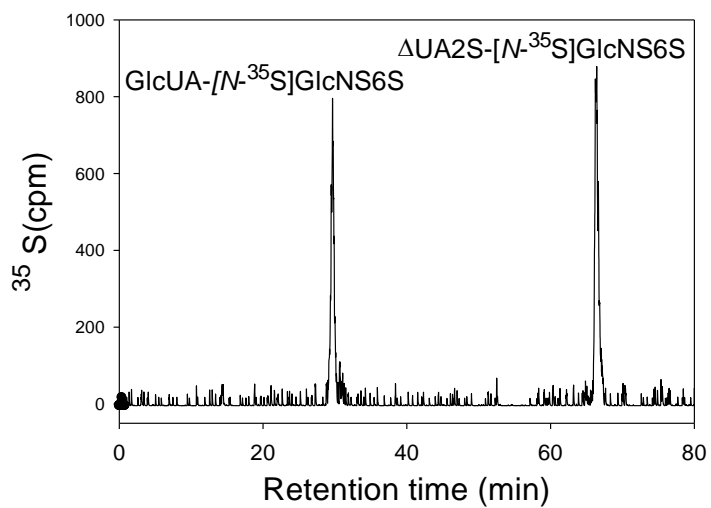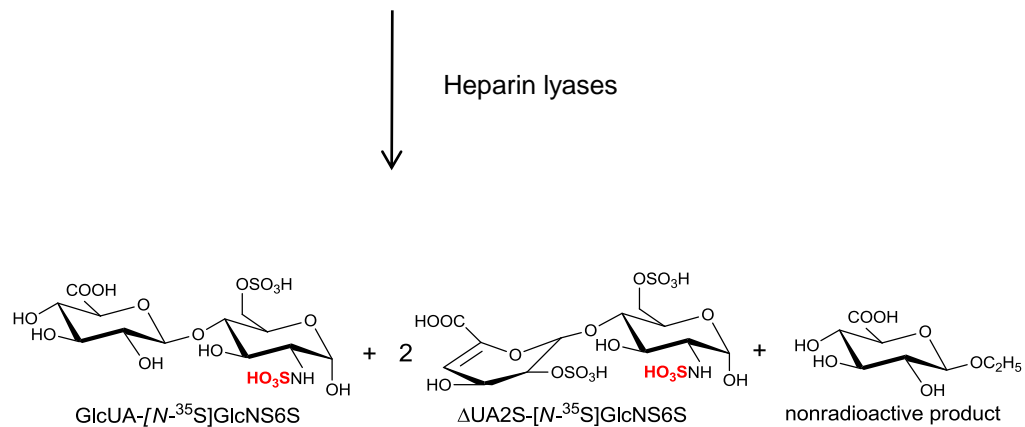

**A**

FGF2 (nM)

4000 2000 1000 500 250 125 64 32 0

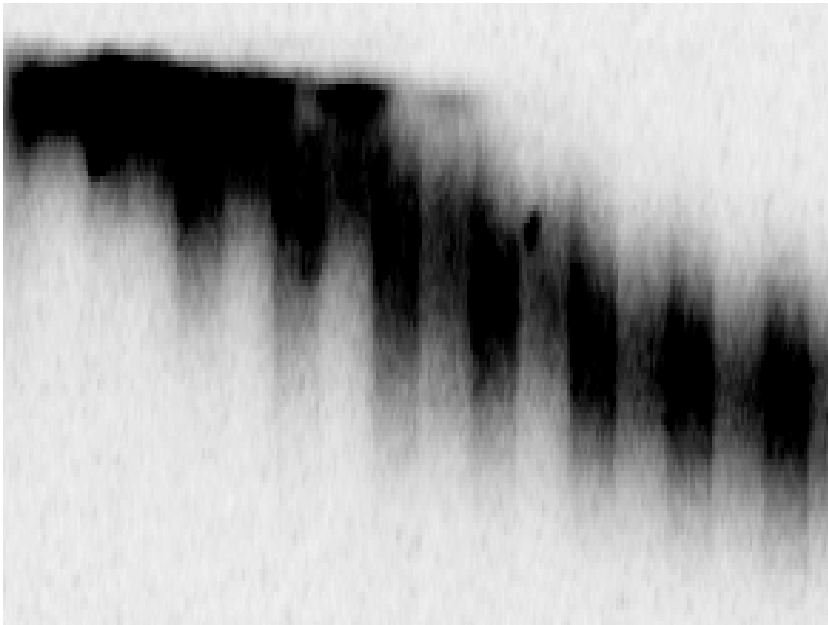

**B**

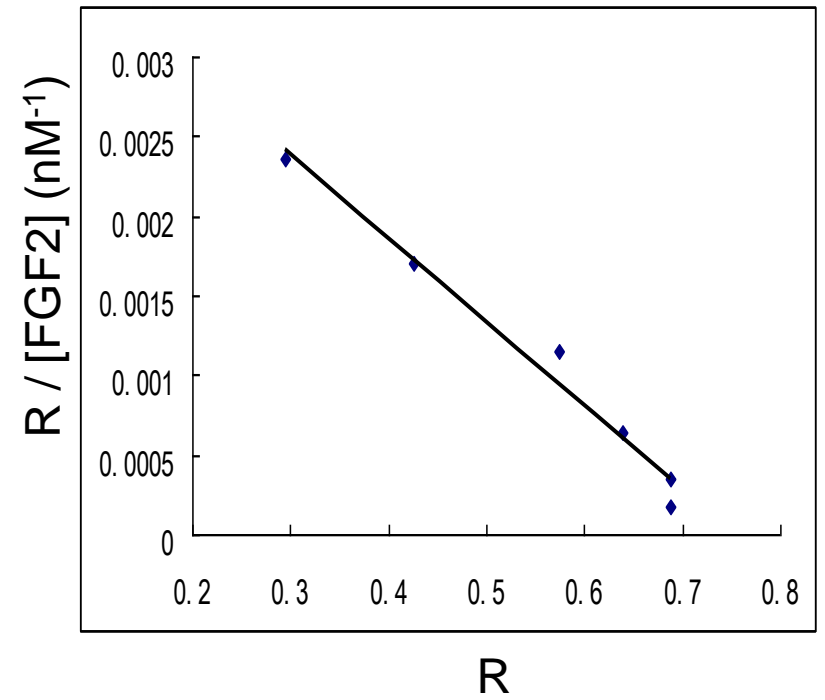

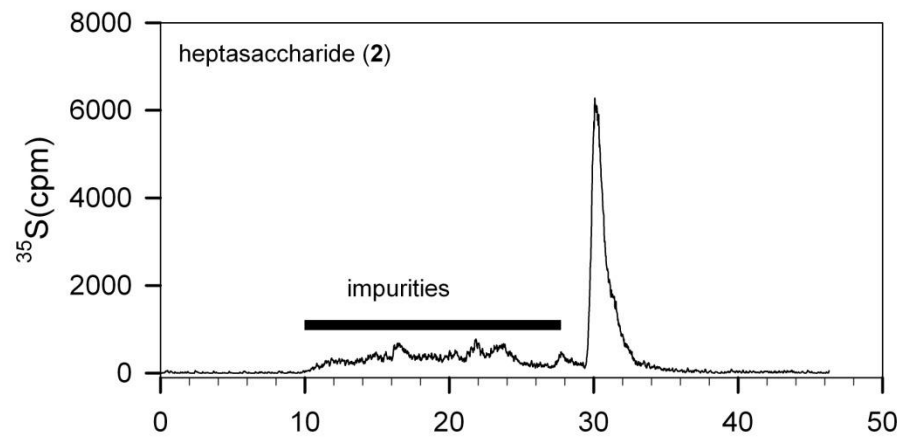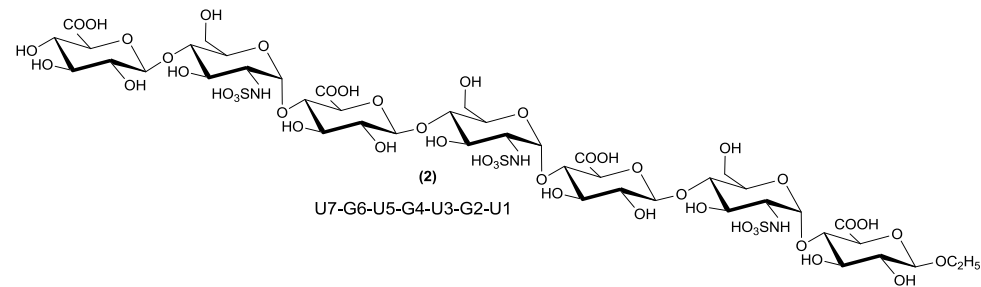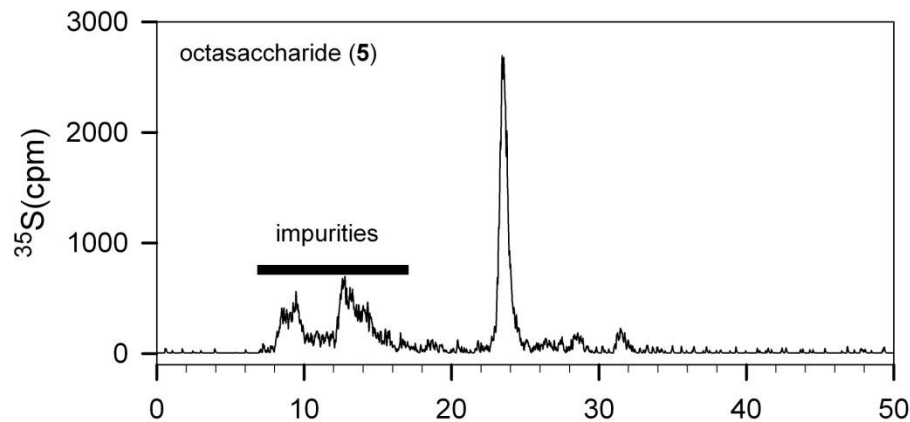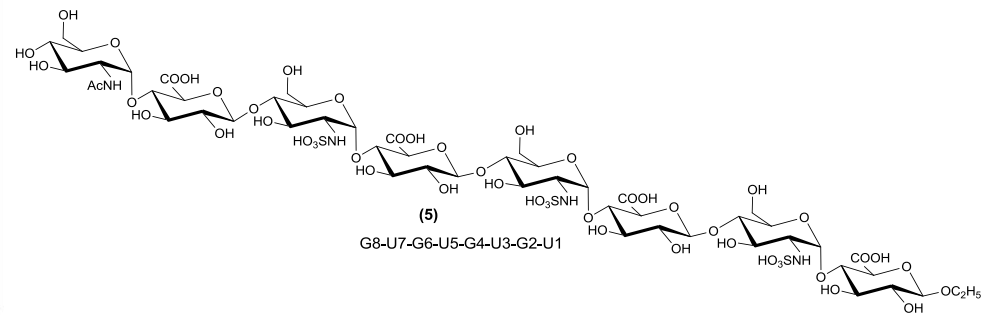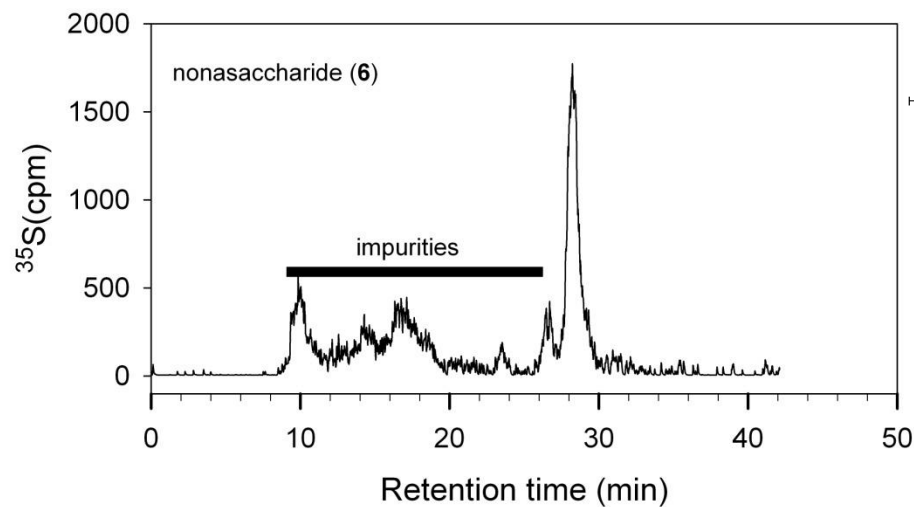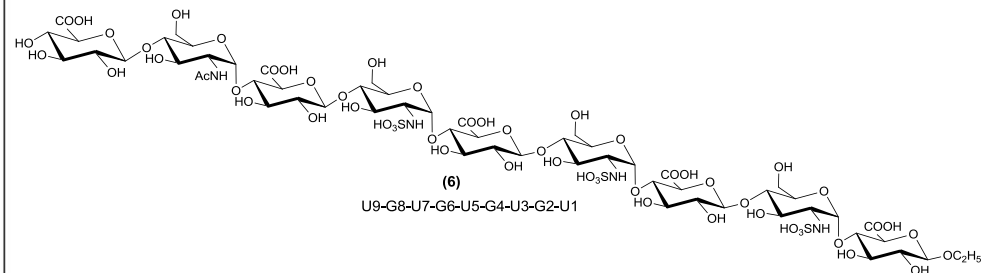

**A.**

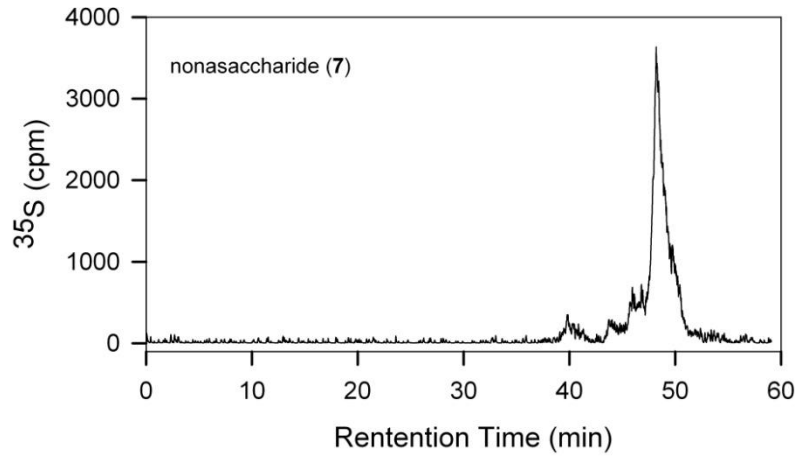

**B.**

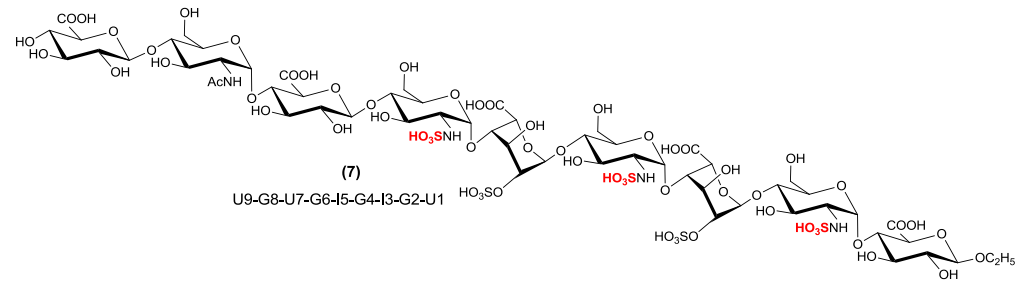

**C.**

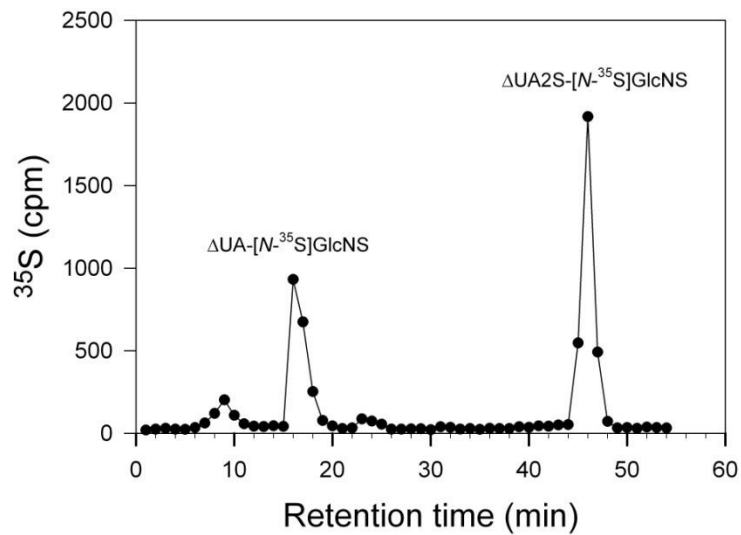

**D.**

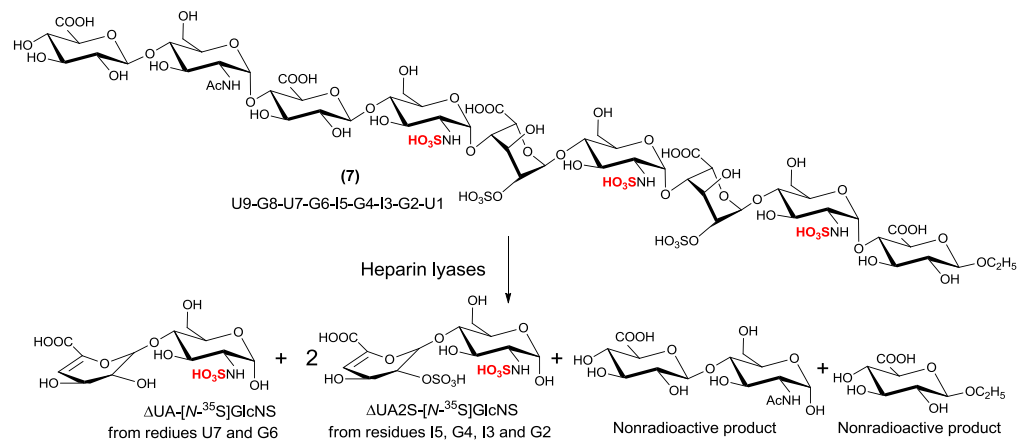



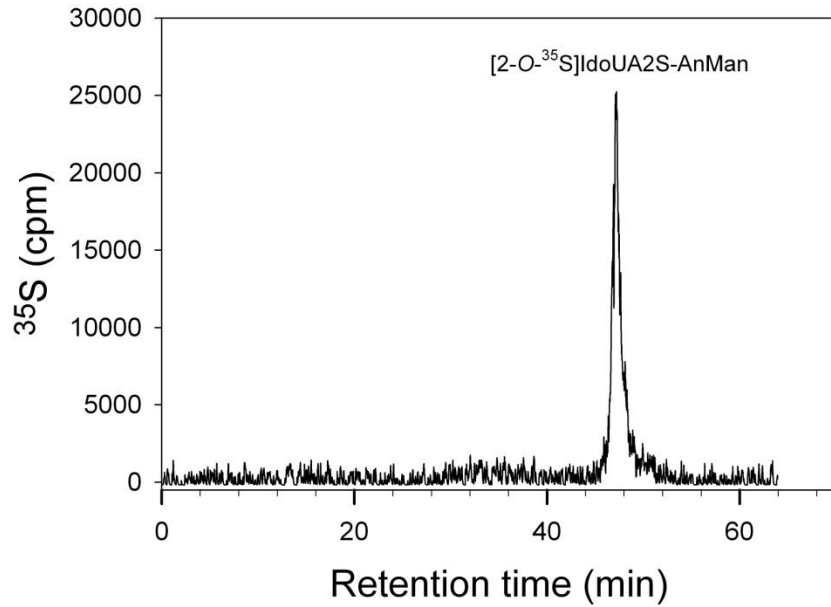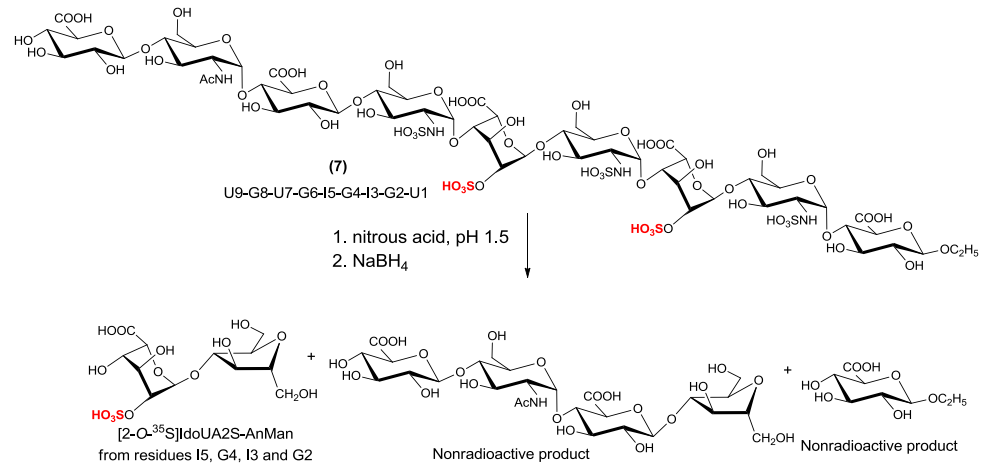

**A.**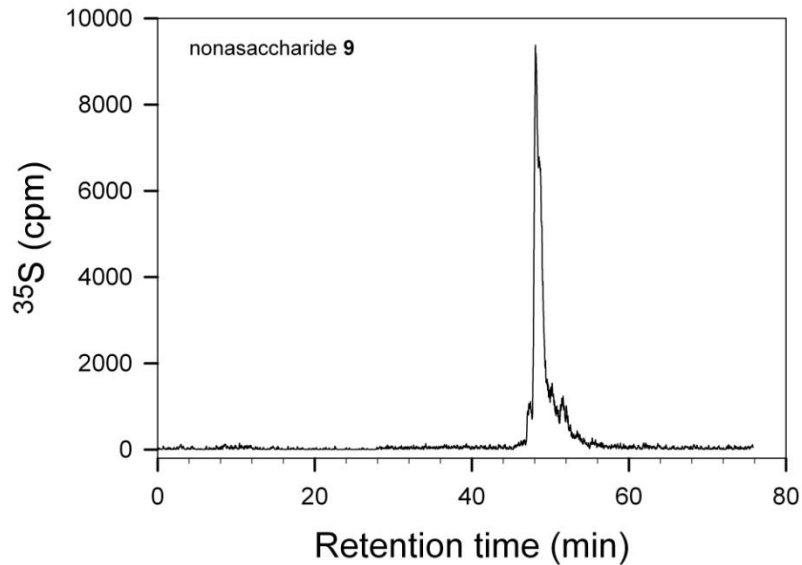**B.**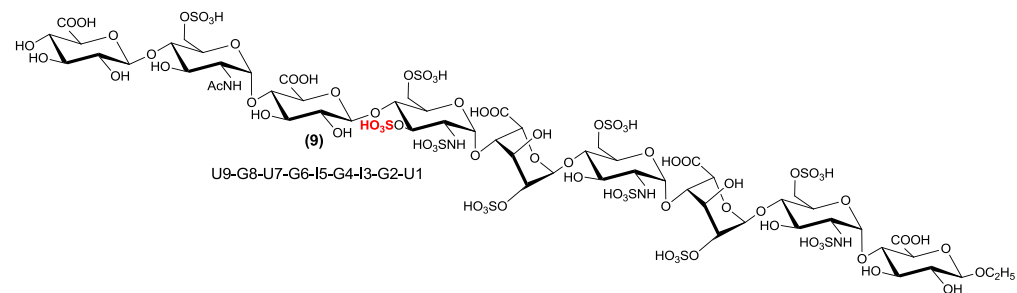**C.**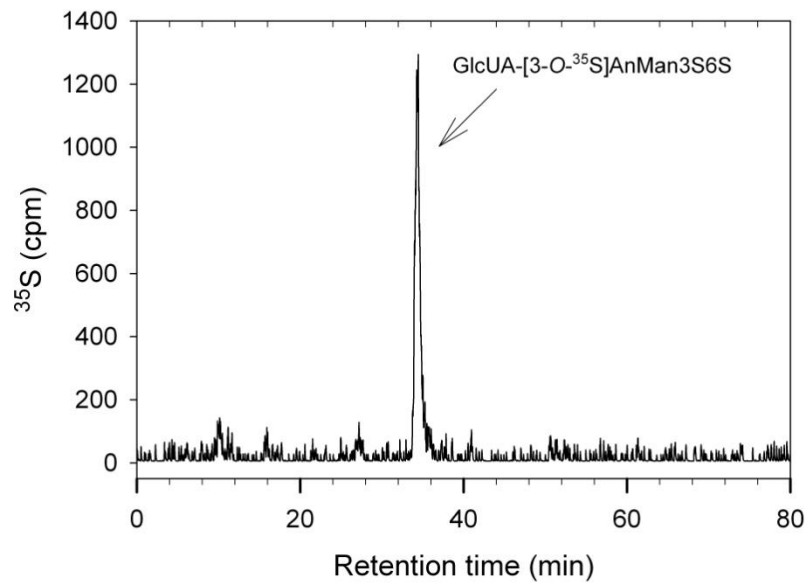**D.**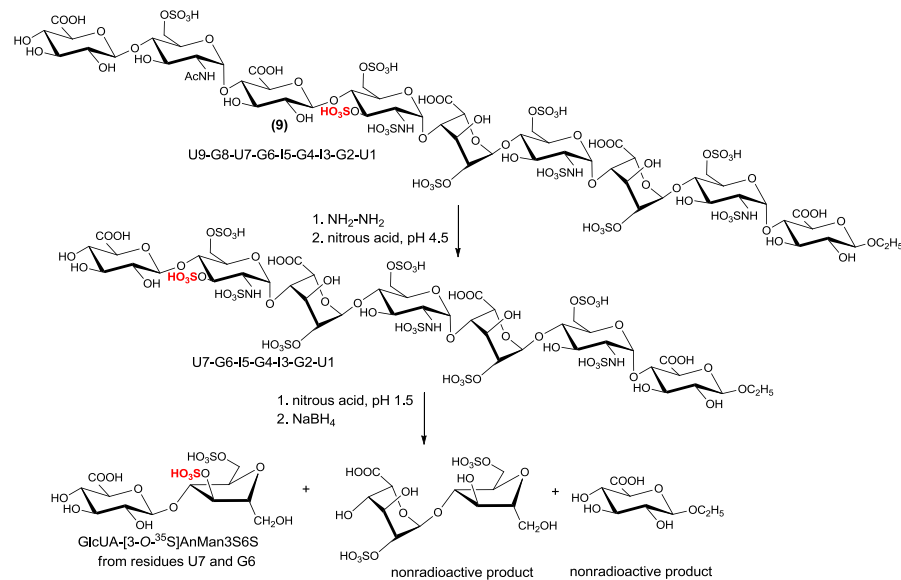

Supplement: supp_cwr109_cwr109supp2.pdf [file supp_cwr109_cwr109supp2.pdf]
